# Supplementary material
Source: PubMed Central journal article supplement (PMC3874697)
Supplement: bph0171-0069-SD1.pdf [file bph0171-0069-SD1.pdf]

Supplementary figure S1

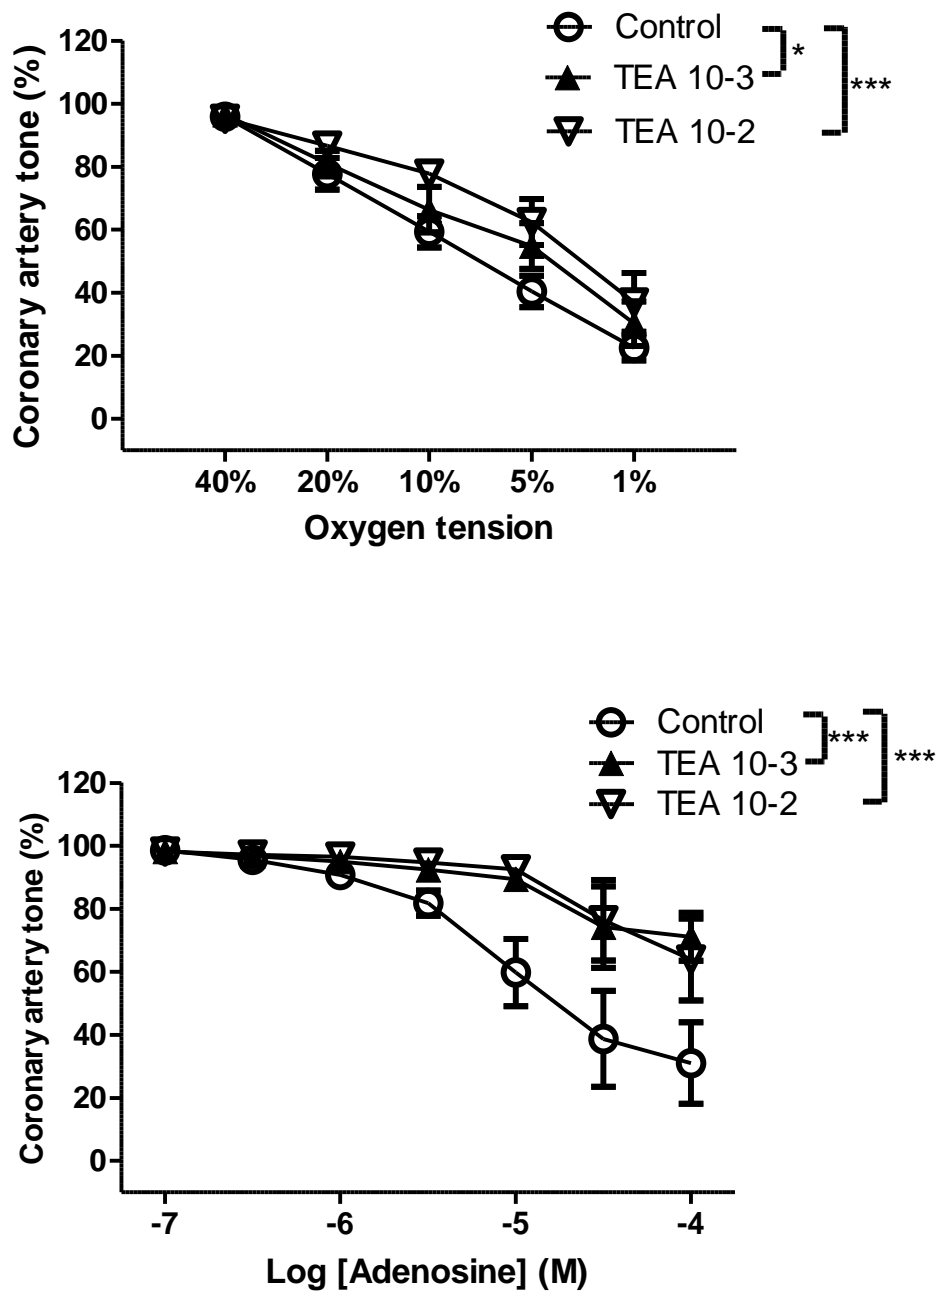

**Figure S1. Effect of K channel inhibition with TEA on hypoxia- and adenosine-induced dilatation in pig coronary artery.**

(A) Concentration-response curves for O<sub>2</sub> lowering in coronary arterial segments without endothelium contracted with PGF<sub>2α</sub> (10 μM) in the absence and presence of the K channel inhibitor TEA (1 mM and 10 mM) (n=7, \*P=0.046, \*\*\*P<0.001 by two way ANOVA). (B) Concentration-response curves for adenosine in coronary arterial segments without endothelium contracted with PGF<sub>2α</sub> (10 μM) in the absence and presence of the K channel inhibitor TEA (1 mM and 10 mM) (n=7, \*\*\*P<0.001 by two way ANOVA).

## Supplementary figure S2

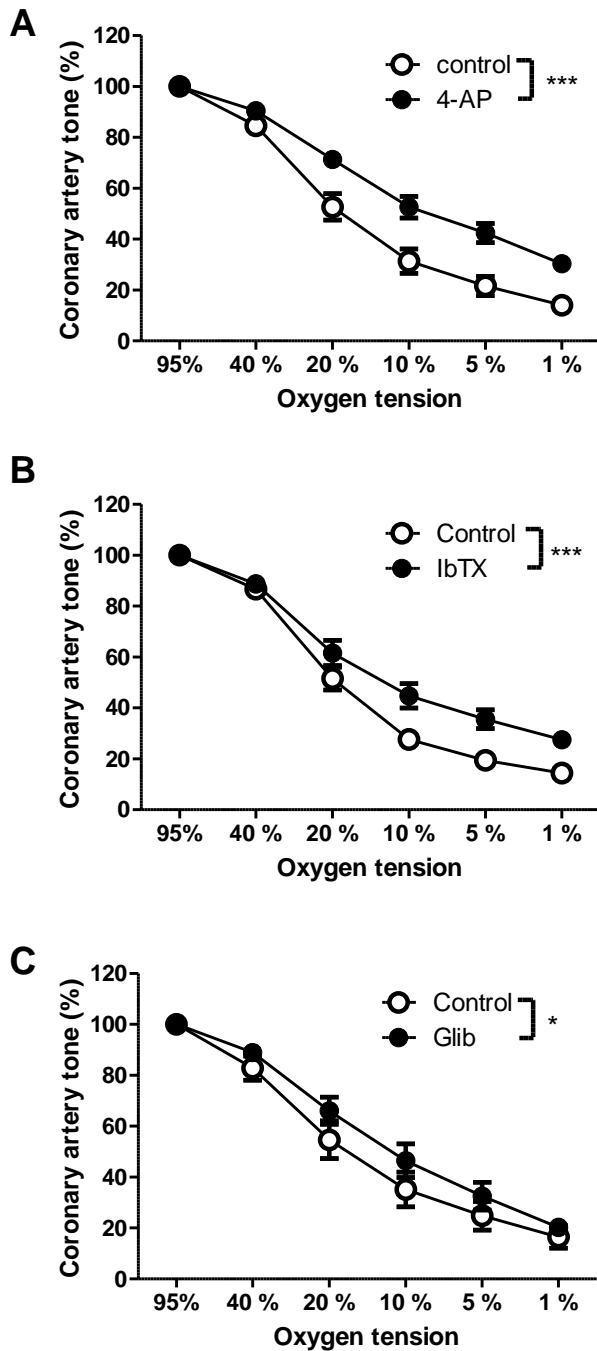

**Figure S2. Effect of K channel inhibition on hypoxia-induced dilatation in pig coronary artery.**

Concentration-response curves for O<sub>2</sub> lowering in coronary arterial segments without endothelium contracted with PGF<sub>2α</sub> (10 μM) in the absence and presence of **(A)**: 4-AP 0.5 mM (n=12, \* P<0.001 by two way ANOVA), **(B)**: IbTX 100 nM (n=6, \* P<0.001 by two way ANOVA) or **(C)**: glibenclamide 3 μM (n=7, \* P<0.05 by two way ANOVA).

Supplementary figure S3

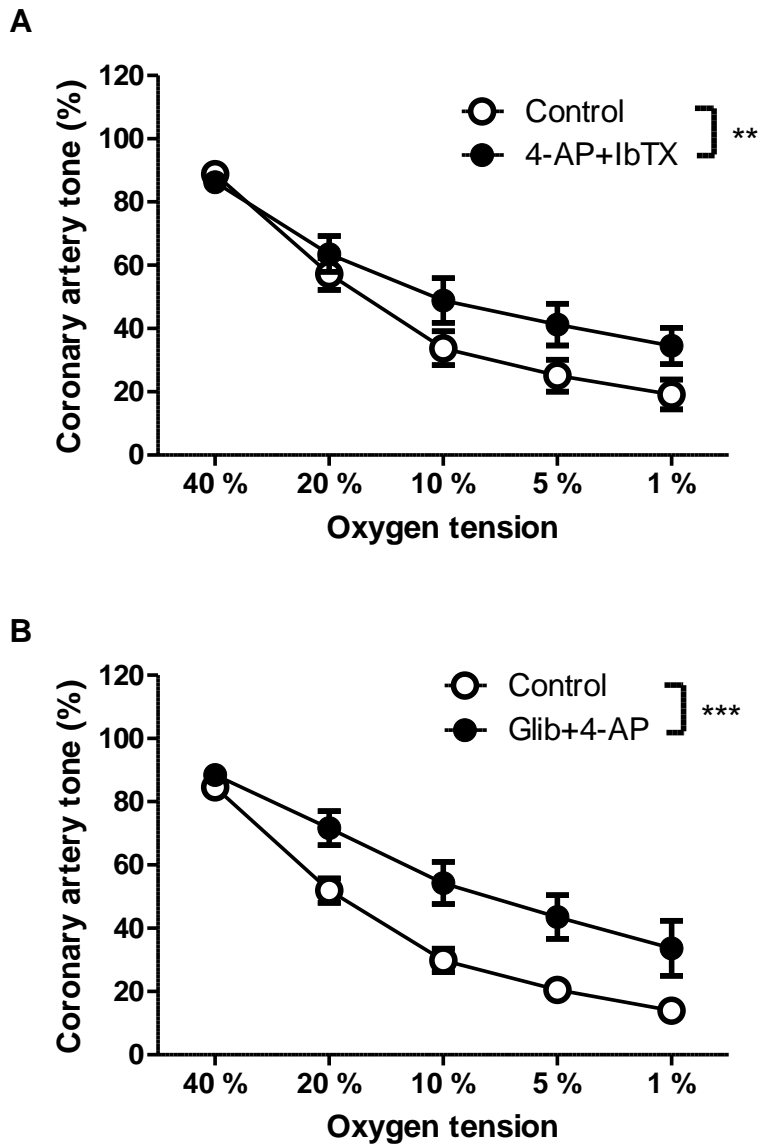

**Figure S3. Effect of K channel inhibition on hypoxia-induced dilatation in pig coronary artery.**

Concentration-response curves for  $O_2$  lowering in coronary arterial segments without endothelium contracted with  $PGF_{2\alpha}$  (10  $\mu M$ ) in the absence and presence of **(A)**: 4-AP 0.5 mM and IbTX 100 nM ( $n=6$ , \*  $P<0.01$  by two way ANOVA), **(B)**: Glibenclamide 3  $\mu M$  and 4-AP 0.5 mM ( $n=6$ , \*  $P<0.001$  by two way ANOVA)

Supplementary figure S4

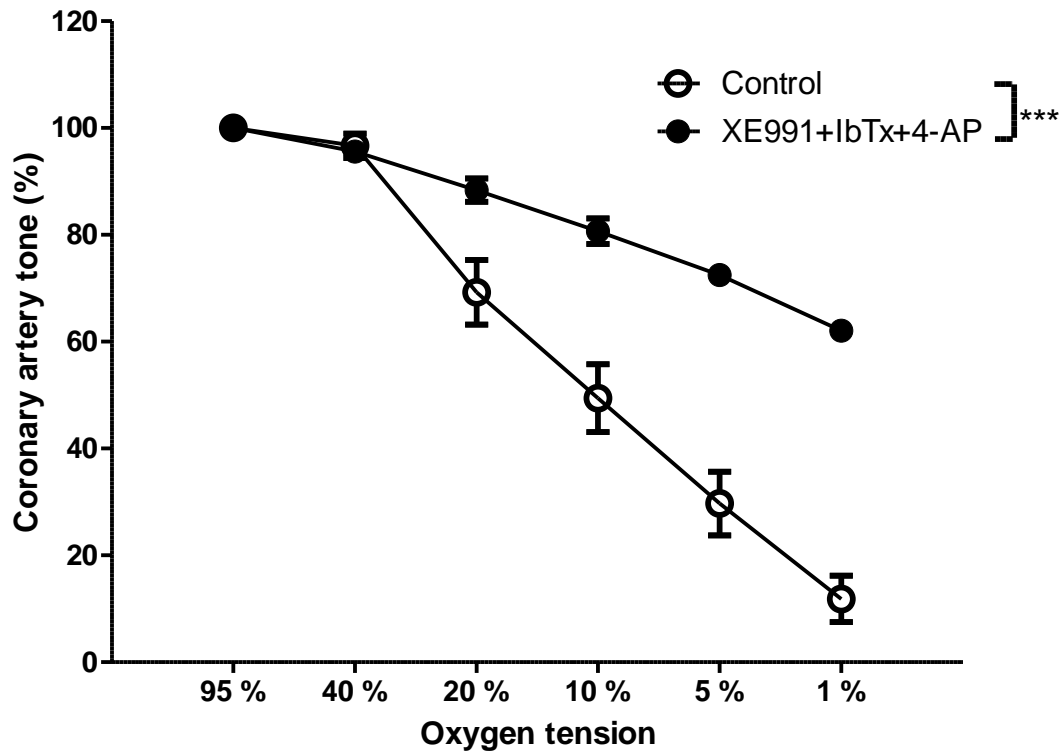

Figure S4.

Effect of K channel inhibition on hypoxia-induced dilatation in pig coronary artery.

Concentration-response curves for  $O_2$  lowering in coronary arterial segments without endothelium contracted with  $PGF_{2\alpha}$  ( $10 \mu M$ ) in the absence and presence of XE991  $10 \mu M$ , 4-AP  $0.5 mM$  and IbTX  $100 nM$  ( $n=7-8$ , \*\*\*  $P<0.001$  by two way ANOVA),

## Supplementary figure S5

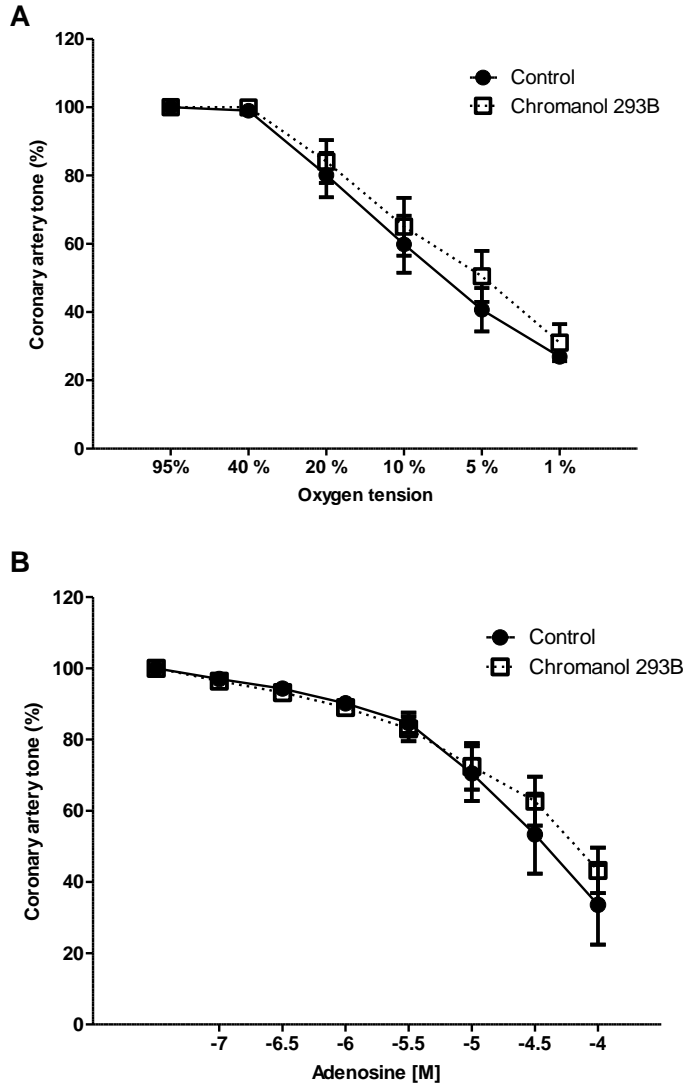

**Figure S5. Effect of  $K_v7.1$  channel inhibition on hypoxia- and adenosine-induced dilatation in pig coronary artery.**

(A) Concentration-response curves for  $O_2$  lowering in coronary arterial segments without endothelium contracted with  $PGF_{2\alpha}$  (10  $\mu M$ ) in the absence and presence of the  $K_v7.1$  channel inhibitor Chromanol 293B (10  $\mu M$ ) ( $n=5$ ,  $P=0.22$  by two way ANOVA). (B) Concentration-response curves for adenosine in coronary arterial segments without endothelium contracted with  $PGF_{2\alpha}$  (10  $\mu M$ ) in the absence and presence of the  $K_v7.1$  channel inhibitor Chromanol 293B (10  $\mu M$ ) ( $n=5$ ,  $P=0.45$  by two way ANOVA).

### Supplementary figure S6

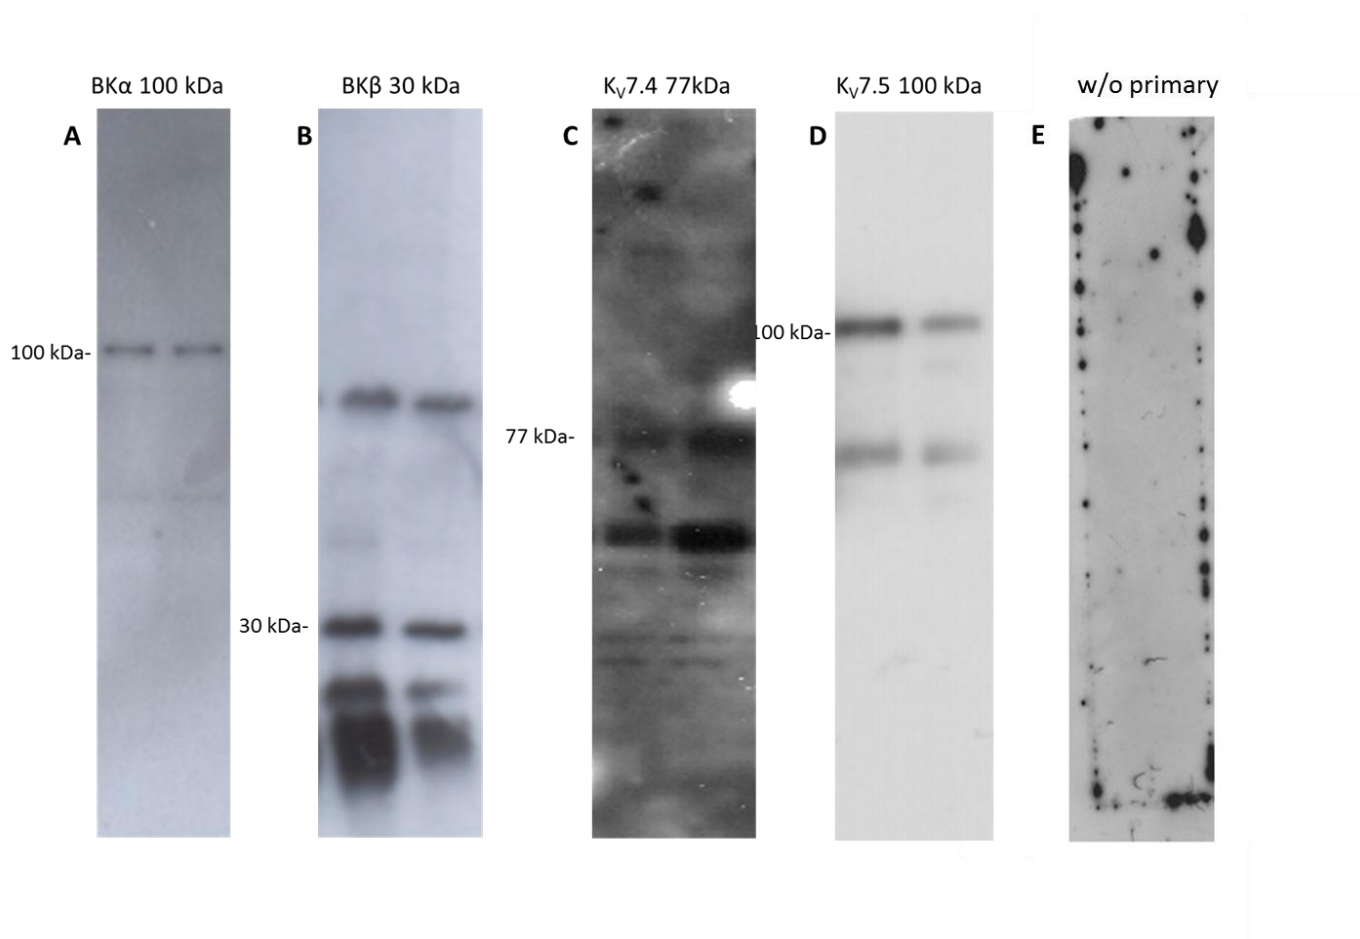

**Figure S6. Detection of BK<sub>C</sub> and K<sub>v</sub>7 K channels by immunoblotting.**

Immunoblot with samples from a normoxic artery in lane 1 and from a hypoxic artery in lane 2 and showing the presence of (A) BK<sub>Ca</sub> $\alpha$  located at 100 kDa (B) BK<sub>Ca</sub> $\beta$  located at 30 kDa (C) K $v$ 7.4 located at 77 kDa and (D) K $v$ 7.5 located at 100 kDa.(E) incubated with secondary antibody goat anti-rabbit IgG conjugated to HRP.
